# Supplementary material for: Dissecting Genetic Networks Underlying Complex Phenotypes: The Theoretical Framework
Source: PLoS One. 2011 Jan 20;6(1):e14541. doi: 10.1371/journal.pone.0014541 (PMC3024316; doi:10.1371/journal.pone.0014541)
Supplement: Table S10 — Nonrandom associations, measured by the normalized gametic linkage disequilibrium statistics (LD'), between loci segregating in a signaling pathway of model (2) resulting from positive and negative selection for increased trait values under the seven scenarios of an RI (or DH) populations defined in Table 1. (0.26 MB DOC) [file pone.0014541.s010.doc]

**Table S10. Non-random associations, measured by the normalized gametic linkage disequilibrium statistics (LD’), between loci segregating in a signaling pathway of model (2) resulting from positive and negative selection for increased trait values under the 7 scenarios of a RI (or DH) populations defined in Table 1**

| Scenario | Mi | Mj | Selection steps (negative) 1 | | | | | | | |  | Selection steps (positive) 1 | | | | | | | |
| --- | --- | --- | --- | --- | --- | --- | --- | --- | --- | --- | --- | --- | --- | --- | --- | --- | --- | --- | --- |
| 8 | 7 | 6 | 5 | 4 | 3 | 2 | 1 | 0 | 1 | 2 | 3 | 4 | 5 | 6 | 7 | 8 |
| **1** | T1 | T2 |  |  | NC | NC |  |  | -1.00 |  | 0.00 |  |  | -1.00 | NC |  |  | NC |  |
| **2** | B11 | B13 |  |  |  | NC | -1.00 | -0.11 | -0.04 | -0.08 | 0.00 |  |  |  | -0.08 | -0.04 | -0.11 | -1.00 | NC |
|  | B11 | B21 |  |  |  | NC | NC | -1.00 | -0.40 | -0.08 | 0.00 |  |  |  | -0.08 | -0.40 | -1.00 | NC | NC |
|  | B11 | B23 |  |  |  | NC | -1.00 | -0.11 | -0.04 | -0.08 | 0.00 |  |  |  | -0.08 | -0.04 | -0.11 | -1.00 | NC |
|  | B13 | B21 |  |  |  | NC | NC | -1.00 | -0.40 | -0.08 | 0.00 |  |  |  | -0.08 | -0.40 | -1.00 | NC | NC |
|  | B13 | B23 |  |  |  | NC | -1.00 | -0.11 | -0.04 | -0.08 | 0.00 |  |  |  | -0.08 | -0.04 | -0.11 | -1.00 | NC |
|  | B21 | B23 |  |  |  | NC | NC | -1.00 | -0.40 | -0.08 | 0.00 |  |  |  | -0.08 | -0.40 | -1.00 | NC | NC |
| **3** | **T1** | **B11** | NC | NC | -1.00** | -0.30 | -0.06 | -0.05 | -0.04 | -0.02 | 0.00 | 0.00 | 0.00 | **0.10** | **0.18** | NC | NC | NC | NC |
|  | **T1** | **B13** | NC | NC | -1.00** | -0.30 | -0.06 | -0.05 | -0.04 | -0.02 | 0.00 | 0.00 | 0.00 | **0.10** | **0.18** | NC | NC | NC | NC |
|  | T1 | T2 | NC | NC | -1.00 | -0.76** | -0.48** | -0.22 | -0.08 | -0.02 | 0.00 | -1.00** | -1.00** | -1.00** | -1.00 | NC | NC | -1.00 | NC |
|  | T1 | B21 | NC | NC | 0.22 | 0.04 | -0.13 | -0.16 | -0.08 | -0.02 | 0.00 | 0.00 | -0.27 | -1.00** | -1.00* | NC | NC | NC | NC |
|  | T1 | B23 | NC | NC | 0.00 | 0.04 | -0.06 | -0.05 | -0.04 | -0.02 | 0.00 | 0.00 | -0.27 | 0.00 | -1.00* | NC | NC | NC | NC |
|  | B11 | B13 | 0.00 | 0.00 | 0.13 | -0.11 | 0.00 | 0.00 | 0.00 | -0.02 | 0.00 | 0.00 | 0.00 | -0.16 | 0.09 | -0.04 | -0.11 | -1.00 | NC |
|  | B11 | T2 | NC | 0.00 | 0.13 | 0.04 | -0.06 | -0.05 | -0.04 | -0.02 | 0.00 | 0.00 | 0.00 | -0.25 | -1.00* | NC | NC | NC | NC |
|  | B11 | B21 | 0.00 | 0.00 | -0.07 | 0.01 | 0.04 | 0.00 | -0.04 | -0.02 | 0.00 | 0.00 | 0.00 | -0.04 | -0.15 | -0.40 | -1.00 | NC | NC |
|  | B11 | B23 | 0.00 | 0.00 | 0.00 | 0.01 | 0.00 | 0.00 | 0.00 | -0.02 | 0.00 | 0.00 | 0.00 | 0.00 | -0.15 | -0.04 | -0.11 | -1.00 | NC |
|  | B13 | T2 | NC | 0.00 | 0.13 | 0.04 | -0.06 | -0.05 | -0.04 | -0.02 | 0.00 | 0.00 | 0.00 | -0.25 | -1.00* | NC | NC | NC | NC |
|  | B13 | B21 | 0.00 | 0.00 | -0.07 | 0.01 | 0.04 | 0.00 | -0.04 | -0.02 | 0.00 | 0.00 | 0.00 | -0.04 | -0.15 | -0.40 | -1.00 | NC | NC |
|  | B13 | B23 | 0.00 | 0.00 | 0.00 | 0.01 | 0.00 | 0.00 | 0.00 | -0.02 | 0.00 | 0.00 | 0.00 | 0.00 | -0.15 | -0.04 | -0.11 | NC | NC |
|  | **T2** | **B21** | NC | -1.00** | -1.00** | -0.30 | -0.13 | -0.16 | -0.08 | -0.02 | 0.00 | 0.00 | **0.08** | **0.18** | **0.18** | NC | NC | NC | NC |
|  | **T2** | **B23** | NC | -1.00** | 0.00 | -0.30 | -0.06 | -0.05 | -0.04 | -0.02 | 0.00 | 0.00 | **0.08** | **0.00** | **0.18** | NC | NC | NC | NC |
|  | B21 | B23 | 0.00 | 0.17 | 0.00 | -0.11 | 0.04 | 0.00 | -0.04 | -0.02 | 0.00 | 0.00 | -0.12 | 0.00 | 0.09 | -0.40 | -1.00 | NC | NC |
| **4** | S | T1 | -1.00** | -1.00** | -0.63** | -0.26** | -0.14 | -0.08 | -0.04 | -0.01 | 0.00 | NC | NC | NC | NC | NC | NC | NC | NC |
|  | S | B11 | 0.00 | 0.00 | -0.10 | -0.08 | -0.02 | -0.02 | -0.02 | -0.01 | 0.00 | NC | NC | NC | NC | NC | NC | NC | NC |
|  | S | B13 | 0.00 | 0.00 | -0.10 | -0.08 | -0.02 | -0.02 | -0.02 | -0.01 | 0.00 | NC | NC | NC | NC | NC | NC | NC | NC |
|  | S | T2 | -1.00* | -0.53** | -0.34** | -0.26** | -0.14 | -0.08 | -0.04 | -0.01 | 0.00 | NC | NC | NC | NC | NC | NC | NC | NC |
|  | S | B21 | 0.00 | -0.16 | -0.22 | -0.08 | -0.04 | -0.06 | -0.04 | -0.01 | 0.00 | NC | NC | NC | NC | NC | NC | NC | NC |
|  | S | B23 | 0.00 | -0.16 | 0.00 | -0.08 | -0.02 | -0.02 | -0.02 | -0.01 | 0.00 | NC | NC | NC | NC | NC | NC | NC | NC |
|  | T1 | B11 | 0.00 | 0.00 | -0.07 | -0.07 | -0.02 | -0.02 | -0.02 | -0.01 | 0.00 | 0.00 | 0.00 | **0.10** | **0.18** | NC | NC | NC | NC |
|  | T1 | B13 | 0.00 | 0.00 | -0.07 | -0.07 | -0.02 | -0.02 | -0.02 | -0.01 | 0.00 | 0.00 | 0.00 | **0.10** | **0.18** | NC | NC | NC | NC |
|  | T1 | T2 | 0.17 | 0.13 | 0.02 | -0.12 | -0.14 | -0.08 | -0.04 | -0.01 | 0.00 | -1.00** | -1.00** | -1.00** | -1.00 | NC | NC | NC | NC |
|  | T1 | B21 | 0.00 | 0.05 | 0.08 | 0.02 | -0.04 | -0.06 | -0.04 | -0.01 | 0.00 | 0.00 | -0.27 | -1.00** | -1.00* | NC | NC | NC | NC |
|  | T1 | B23 | 0.00 | 0.05 | 0.00 | 0.02 | -0.02 | -0.02 | -0.02 | -0.01 | 0.00 | 0.00 | -0.27 | 0.00 | -1.00* | NC | NC | NC | NC |
|  | B11 | B13 | 0.00 | 0.00 | 0.04 | -0.03 | 0.00 | 0.00 | 0.00 | -0.01 | 0.00 | 0.00 | 0.00 | -0.16 | 0.09 | -0.04 | -0.11 | -1.00 | NC |
|  | B11 | T2 | 0.00 | 0.00 | 0.04 | 0.02 | -0.02 | -0.02 | -0.02 | -0.01 | 0.00 | 0.00 | 0.00 | -0.25 | -1.00* | NC | NC | NC | NC |
|  | B11 | B21 | 0.00 | 0.00 | 0.00 | 0.01 | 0.02 | 0.00 | -0.02 | -0.01 | 0.00 | 0.00 | 0.00 | -0.04 | -0.15 | -0.40 | -1.00 | NC | NC |
|  | B11 | B23 | 0.00 | 0.00 | 0.00 | 0.01 | 0.00 | 0.00 | 0.00 | -0.01 | 0.00 | 0.00 | 0.00 | 0.00 | -0.15 | -0.04 | -0.11 | -1.00 | NC |
|  | B13 | T2 | 0.00 | 0.00 | 0.04 | 0.02 | -0.02 | -0.02 | -0.02 | -0.01 | 0.00 | 0.00 | 0.00 | -0.25 | -1.00* | NC | NC | NC | NC |
|  | B13 | B21 | 0.00 | 0.00 | 0.00 | 0.01 | 0.02 | 0.00 | -0.02 | -0.01 | 0.00 | 0.00 | 0.00 | -0.04 | -0.15 | -0.40 | -1.00 | NC | NC |
|  | B13 | B23 | 0.00 | 0.00 | 0.00 | 0.01 | 0.00 | 0.00 | 0.00 | -0.01 | 0.00 | 0.00 | 0.00 | 0.00 | -0.15 | -0.04 | -0.11 | -1.00 | NC |
|  | T2 | B21 | 0.00 | -0.07 | -0.12 | -0.07 | -0.04 | -0.06 | -0.04 | -0.01 | 0.00 | 0.00 | **0.08** | **0.18** | **0.18** | NC | NC | NC | NC |
|  | T2 | B23 | 0.00 | -0.07 | 0.00 | -0.07 | -0.02 | -0.02 | -0.02 | -0.01 | 0.00 | 0.00 | **0.08** | **0.00** | **0.18** | NC | NC | NC | NC |
|  | B21 | B23 | 0.00 | 0.05 | 0.00 | -0.03 | 0.02 | 0.00 | -0.02 | -0.01 | 0.00 | 0.00 | -0.12 | 0.00 | 0.09 | -0.40 | -1.00 | NC | NC |
| **5** | S | T11 |  |  |  | -0.23 |  |  |  | -0.02 | 0.00 |  |  |  | NC |  |  |  | NC |
|  | S | T12 |  |  |  | -0.23 |  |  |  | -0.02 | 0.00 |  |  |  | NC |  |  |  | NC |
|  | S | T21 |  |  |  | -0.09 |  |  |  | -0.02 | 0.00 |  |  |  | NC |  |  |  | NC |
|  | S | T22 |  |  |  | -0.09 |  |  |  | -0.02 | 0.00 |  |  |  | NC |  |  |  | NC |
|  | S | T23 |  |  |  | -0.09 |  |  |  | -0.02 | 0.00 |  |  |  | NC |  |  |  | NC |
|  | T11 | T12 |  |  |  | -0.20 |  |  |  | -0.02 | 0.00 |  |  |  | **0.39** |  |  |  | NC |
|  | T11 | T21 |  |  |  | 0.01 |  |  |  | -0.02 | 0.00 |  |  |  | -1.00 |  |  |  | NC |
|  | T11 | T22 |  |  |  | 0.01 |  |  |  | -0.02 | 0.00 |  |  |  | -1.00 |  |  |  | NC |
|  | T11 | T23 |  |  |  | 0.01 |  |  |  | -0.02 | 0.00 |  |  |  | -1.00 |  |  |  | NC |
|  | T12 | T21 |  |  |  | 0.01 |  |  |  | -0.02 | 0.00 |  |  |  | -1.00 |  |  |  | NC |
|  | T12 | T22 |  |  |  | 0.01 |  |  |  | -0.02 | 0.00 |  |  |  | -1.00 |  |  |  | NC |
|  | T12 | T23 |  |  |  | 0.01 |  |  |  | -0.02 | 0.00 |  |  |  | -1.00 |  |  |  | NC |
|  | T21 | T22 |  |  |  | -0.07 |  |  |  | -0.02 | 0.00 |  |  |  | **0.21** |  |  |  | NC |
|  | T21 | T23 |  |  |  | -0.07 |  |  |  | -0.02 | 0.00 |  |  |  | **0.21** |  |  |  | NC |
|  | T22 | T23 |  |  |  | -0.07 |  |  |  | -0.02 | 0.00 |  |  |  | **0.21** |  |  |  | NC |
| **6** | T1 | B111 |  | NC | NC | -0.26* | 0.00 | -0.08 | 0.00 | -0.01 | 0.00 |  | 0.00 | 0.00 | **0.15** | NC | NC | NC | NC |
|  | T1 | B112 |  | NC | NC | -0.26* | 0.00 | -0.08 | 0.00 | -0.01 | 0.00 |  | 0.00 | 0.00 | **0.15** | NC | NC | NC | NC |
|  | T1 | T2 |  | NC | NC | -1.00** | -1.00** | -0.13 | -0.04 | -0.01 | 0.00 |  | -1.00** | -1.00** | -1.00 | NC | NC | NC | NC |
|  | T1 | B211 |  | NC | NC | 0.05 | 0.00 | -0.03 | -0.04 | -0.01 | 0.00 |  | 0.00 | -1.00** | -1.00** | NC | NC | NC | NC |
|  | T1 | B212 |  | NC | NC | 0.05 | 0.00 | -0.03 | -0.04 | -0.01 | 0.00 |  | 0.00 | -1.00** | -1.00** | NC | NC | NC | NC |
|  | T1 | B213 |  | NC | NC | 0.05 | 0.00 | -0.03 | -0.04 | -0.01 | 0.00 |  | 0.00 | -1.00** | -1.00** | NC | NC | NC | NC |
|  | B111 | B112 |  | 0.00 | 0.00 | -0.13 | 0.00 | -0.07 | 0.00 | -0.01 | 0.00 |  | 0.00 | 0.00 | **0.15** | **0.00** | **0.39** | 0.00 | NC |
|  | B111 | T2 |  | NC | 0.00 | 0.09 | 0.00 | -0.08 | 0.00 | -0.01 | 0.00 |  | 0.00 | 0.00 | -1.00** | NC | NC | NC | NC |
|  | B111 | B211 |  | 0.00 | 0.00 | -0.01 | 0.00 | 0.01 | 0.00 | -0.01 | 0.00 |  | 0.00 | 0.00 | -0.02 | 0.00 | -1.00 | NC | NC |
|  | B111 | B212 |  | 0.00 | 0.00 | -0.01 | 0.00 | 0.01 | 0.00 | -0.01 | 0.00 |  | 0.00 | 0.00 | -0.02 | 0.00 | -1.00 | NC | NC |
|  | B111 | B213 |  | 0.00 | 0.00 | -0.01 | 0.00 | 0.01 | 0.00 | -0.01 | 0.00 |  | 0.00 | 0.00 | -0.02 | 0.00 | -1.00 | NC | NC |
|  | B112 | T2 |  | NC | 0.00 | 0.09 | 0.00 | -0.08 | 0.00 | -0.01 | 0.00 |  | 0.00 | 0.00 | -1.00** | NC | NC | NC | NC |
|  | B112 | B211 |  | 0.00 | 0.00 | -0.01 | 0.00 | 0.01 | 0.00 | -0.01 | 0.00 |  | 0.00 | 0.00 | -0.02 | 0.00 | -1.00 | NC | NC |
|  | B112 | B212 |  | 0.00 | 0.00 | -0.01 | 0.00 | 0.01 | 0.00 | -0.01 | 0.00 |  | 0.00 | 0.00 | -0.02 | 0.00 | -1.00 | NC | NC |
|  | B112 | B213 |  | 0.00 | 0.00 | -0.01 | 0.00 | 0.01 | 0.00 | -0.01 | 0.00 |  | 0.00 | 0.00 | -0.02 | 0.00 | -1.00 | NC | NC |
|  | T2 | B211 |  | NC | -0.08 | -0.10 | 0.00 | -0.03 | -0.04 | -0.01 | 0.00 |  | 0.00 | **0.06** | **0.08** | NC | NC | NC | NC |
|  | T2 | B212 |  | NC | -0.08 | -0.10 | 0.00 | -0.03 | -0.04 | -0.01 | 0.00 |  | 0.00 | **0.06** | **0.08** | NC | NC | NC | NC |
|  | T2 | B213 |  | NC | -0.08 | -0.10 | 0.00 | -0.03 | -0.04 | -0.01 | 0.00 |  | 0.00 | **0.06** | **0.08** | NC | NC | NC | NC |
|  | B211 | B212 |  | 0.00 | -0.08 | -0.06 | 0.00 | -0.03 | -0.04 | -0.01 | 0.00 |  | 0.00 | **0.06** | **0.08** | 0.00 | 0.21 | NC | NC |
|  | B211 | B213 |  | 0.00 | -0.08 | -0.06 | 0.00 | -0.03 | -0.04 | -0.01 | 0.00 |  | 0.00 | **0.06** | **0.08** | 0.00 | 0.21 | NC | NC |
|  | B212 | B213 |  | 0.00 | -0.08 | -0.06 | 0.00 | -0.03 | -0.04 | -0.01 | 0.00 |  | 0.00 | **0.06** | **0.08** | 0.00 | 0.21 | NC | NC |
| **7** | B12 | B13 |  | NC | NC | -1.00** | -0.08 | -0.03 | -0.01 | 0.00 | 0.00 |  | -0.32** | -0.33** | -0.21 | -0.17 | -1.00 | NC | NC |
|  | B12 | T2 |  | NC | NC | -0.52** | -0.25** | -0.06 | -0.02 | 0.00 | 0.00 |  | -0.19** | -1.00** | -1.00** | NC | NC | NC | NC |
|  | B12 | B211 |  | NC | NC | 0.02 | -0.01 | -0.02 | -0.02 | 0.00 | 0.00 |  | -0.01 | -0.09 | -0.39* | -1.00* | -1.00 | NC | NC |
|  | B12 | B212 |  | NC | NC | 0.02 | -0.01 | -0.02 | -0.02 | 0.00 | 0.00 |  | -0.01 | -0.09 | -0.39* | -1.00* | -1.00 | NC | NC |
|  | B12 | B213 |  | NC | NC | 0.02 | -0.01 | -0.02 | -0.02 | 0.00 | 0.00 |  | -0.01 | -0.09 | -0.39* | -1.00* | -1.00 | NC | NC |
|  | B12 | B22 |  | NC | NC | -0.09 | -0.08 | -0.03 | -0.01 | 0.00 | 0.00 |  | -0.05 | -0.33** | -0.50* | -0.17 | -1.00 | NC | NC |
|  | B12 | B23 |  | NC | NC | -0.09 | -0.08 | -0.03 | -0.01 | 0.00 | 0.00 |  | -0.05 | -0.33** | -0.50* | -0.17 | -1.00 | NC | NC |
|  | B13 | T2 |  | NC | -0.41** | 0.04 | -0.12 | -0.04 | -0.01 | 0.00 | 0.00 |  | -0.19** | 0.08 | -1.00** | NC | NC | NC | NC |
|  | B13 | B211 |  | NC | 0.02 | -0.01 | 0.00 | -0.01 | -0.01 | 0.00 | 0.00 |  | -0.01 | -0.02 | -0.08 | -0.17 | -1.00 | NC | NC |
|  | B13 | B212 |  | NC | 0.02 | -0.01 | 0.00 | -0.01 | -0.01 | 0.00 | 0.00 |  | -0.01 | -0.02 | -0.08 | -0.17 | -1.00 | NC | NC |
|  | B13 | B213 |  | NC | 0.02 | -0.01 | 0.00 | -0.01 | -0.01 | 0.00 | 0.00 |  | -0.01 | -0.02 | -0.08 | -0.17 | -1.00 | NC | NC |
|  | B13 | B22 |  | NC | -0.03 | -0.04 | -0.01 | -0.03 | 0.00 | 0.00 | 0.00 |  | -0.05 | -0.01 | -0.16 | -0.44 | 0.17 | -1.00 | NC |
|  | B13 | B23 |  | NC | -0.03 | -0.04 | -0.01 | -0.03 | 0.00 | 0.00 | 0.00 |  | -0.05 | -0.01 | -0.16 | -0.44 | 0.17 | -1.00 | NC |
|  | T2 | B211 |  | -0.12 | -0.10 | -0.08 | -0.06 | -0.03 | -0.02 | 0.00 | 0.00 |  | 0.00 | **0.02** | **0.06** | NC | NC | NC | NC |
|  | T2 | B212 |  | -0.12 | -0.10 | -0.08 | -0.06 | -0.03 | -0.02 | 0.00 | 0.00 |  | 0.00 | **0.02** | **0.06** | NC | NC | NC | NC |
|  | T2 | B213 |  | -0.12 | -0.10 | -0.08 | -0.06 | -0.03 | -0.02 | 0.00 | 0.00 |  | 0.00 | **0.02** | **0.06** | NC | NC | NC | NC |
|  | T2 | B22 |  | -1.00** | -0.41** | -0.18* | -0.12 | -0.04 | -0.01 | 0.00 | 0.00 |  | **0.03** | **0.08** | **0.13** | NC | NC | NC | NC |
|  | T2 | B23 |  | -1.00** | -0.41** | -0.18* | -0.12 | -0.04 | -0.01 | 0.00 | 0.00 |  | **0.03** | **0.08** | **0.13** | NC | NC | NC | NC |
|  | B211 | B212 |  | -0.03 | -0.05 | -0.05 | -0.04 | -0.03 | -0.02 | 0.00 | 0.00 |  | 0.00 | **0.02** | **0.06** | 0.17 | 0.32 | NC | NC |
|  | B211 | B213 |  | -0.03 | -0.05 | -0.05 | -0.04 | -0.03 | -0.02 | 0.00 | 0.00 |  | 0.00 | **0.02** | **0.06** | 0.17 | 0.32 | NC | NC |
|  | B211 | B22 |  | 0.025 | 0.02 | 0.00 | 0.00 | -0.01 | -0.01 | 0.00 | 0.00 |  | 0.00 | -0.02 | -0.02 | -0.17 | -1.00 | NC | NC |
|  | B211 | B23 |  | 0.025 | 0.02 | 0.00 | 0.00 | -0.01 | -0.01 | 0.00 | 0.00 |  | 0.00 | -0.02 | -0.02 | -0.17 | -1.00 | NC | NC |
|  | B212 | B213 |  | -0.03 | -0.05 | -0.05 | -0.04 | -0.03 | -0.02 | 0.00 | 0.00 |  | 0.00 | **0.02** | **0.06** | 0.17 | 0.32 | NC | NC |
|  | B212 | B22 |  | 0.025 | 0.02 | 0.00 | 0.00 | -0.01 | -0.01 | 0.00 | 0.00 |  | 0.00 | -0.02 | -0.02 | -0.17 | -1.00 | NC | NC |
|  | B212 | B23 |  | 0.025 | 0.02 | 0.00 | 0.00 | -0.01 | -0.01 | 0.00 | 0.00 |  | 0.00 | -0.02 | -0.02 | -0.17 | -1.00 | NC | NC |
|  | B213 | B22 |  | 0.025 | 0.02 | 0.00 | 0.00 | -0.01 | -0.01 | 0.00 | 0.00 |  | 0.00 | -0.02 | -0.02 | -0.17 | -1.00 | NC | NC |
|  | B213 | B23 |  | 0.025 | 0.02 | 0.00 | 0.00 | -0.01 | -0.01 | 0.00 | 0.00 |  | 0.00 | -0.02 | -0.02 | -0.17 | -1.00 | NC | NC |
|  | B22 | B23 |  | 0.152 | -0.03 | 0.00 | -0.01 | -0.03 | 0.00 | 0.00 | 0.00 |  | -0.04 | -0.01 | -0.04 | -0.44 | 0.17 | -1.00 | NC |

1 Selectionsteps are the same as defined in Table S9, where ‘0’ is the original random population without selection. * and ** indicate the significance levels of *p* = 0.05 and 0.01 based on chi-square tests. ‘NC’ indicate the situation where LD’ statistics could not be computed because one or both loci in the analysis reach the fixation.
