# Supplementary material for: Dissecting Genetic Networks Underlying Complex Phenotypes: The Theoretical Framework
Source: PLoS One. 2011 Jan 20;6(1):e14541. doi: 10.1371/journal.pone.0014541 (PMC3024316; doi:10.1371/journal.pone.0014541)
Supplement: Table S11 — Genetic parameters of 16 QTLs in seven groups (QG) affecting plant heights identified in the IR64/Azucena DH population evaluated in 1994 wet season at IRRI [36]. (0.07 MB DOC) [file pone.0014541.s011.doc]

**Table S11.** Genetic parameters of 16 QTLs in 7 groups (*QG*) affecting plant heights identified in the IR64/Azucena DH population evaluated in 1994 wet season at IRRI [36]

| QTLs | QG | Marker interval | Effects (cm) | F | P |
| --- | --- | --- | --- | --- | --- |
| *SD1* | *QG1* | RZ730 - RG810 | 12.2 | 395.7 | 2.1x10-40 |
| *QPh3b* | *QG1-1* | RZ394 - RZ284 | -4.4 | 48.8 | 1.5x10-10 |
| *QPh4a* | *QG1-2* | RG908 - RG190 | -3.8 | 37.3 | 1.2x10-8 |
| *SD1* vs *QPh3b* | *QG1-1* | RZ730 vs RZ394 | -5.2 | 62.9 | 1.1x10-12 |
| *SD1* vs *QPh4a* | *QG1-2* | RZ801 vs RG190 | -3.1 | 24.2 | 2.7x10-6 |
| *SD1* vs *QPh2a* | *QG1-4* | RZ730 vs RG654 | -3.1 | 23.5 | 3.7x10-6 |
| *SD1* vs *QPh7b* | *QG1-5* | RZ801 vs RG511 | -4.6 | 47.6 | 2.4x10-10 |
| *SD1* vs *QPh12* | *QG1-6* | RG810 vs RG457 | -3.1 | 24.0 | 3.0x10-6 |
| *QPh8a* | *QG1-3* | TGMS1.2 - AG8 | -5.0 | 48.9 | 1.5x10-10 |
| *SD1* vs *QPh8a* | *QG1-3* | RZ730 vs TGMS1.2 | -4.3 | 36.0 | 2.1x10-8 |
| *SD1* vs *QPh9b* | *QG1-3* | RZ801 vs RZ422 | 4.8 | 59.6 | 3.3x10-12 |
| *Qph8a* vs *QPh9b* | *QG1-3* | TGMS1.2 vs RZ422 | -5.3 | 54.6 | 1.9x10-11 |
| *QPh3a* | *QG2* | RG348 – RZ329 | 4.3 | 15.7 | 3.1x10-4 |
| *QPh3c* | *QG3* | CDO87 - RG418a | 5.3 | 25.1 | 1.2x10-5 |
| *QPh3c vs QPh7a* | *QG3* | RG418a vs RG773 | -6.0 | 33.1 | 1.2x10-6 |
| *QPh4c* | *QG4* | RZ590 – RG143 | 5.1 | 21.5 | 3.9x10-5 |
| *QPh9a* | *QG5* | C711 – CDO509 | 4.4 | 14.2 | 5.4x10-4 |
| *QPh1 vs QPh5a* | *QG6* | RG381 – RZ649 | 6.1 | 41.4 | 1.3x10-7 |
| *QPh5b vs QPh11* | *QG7* | RG13 – RZ536 | 6.7 | 107.5 | 1.6x10-18 |

1 All QTL main and epistatic effects and associated statistics were obtained using ANOVA. 2 All QTL effects of loci in the *QG2*-*QG6* were estimated by controlling the *SD1* effect in the genetic background of *sd1*. The effect of typical complementary epistasis *QG7* was estimated from their theoretical genetic expectation based on Table S8.
